# Supplementary material for: Isolation and Characterization of the Arapaima gigas Growth Hormone (ag-GH) cDNA and Three-Dimensional Modeling of This Hormone in Comparison with the Human Hormone (hGH)
Source: MDPI journal article supplement (doi:10.3390/biom13010158), 2023-01-12

Figure S1. Comparison of Ramachandran plots and QMEAN scores of SWISS-MODEL's selected model, the two refined ones, and the model obtained from AlphaFold.

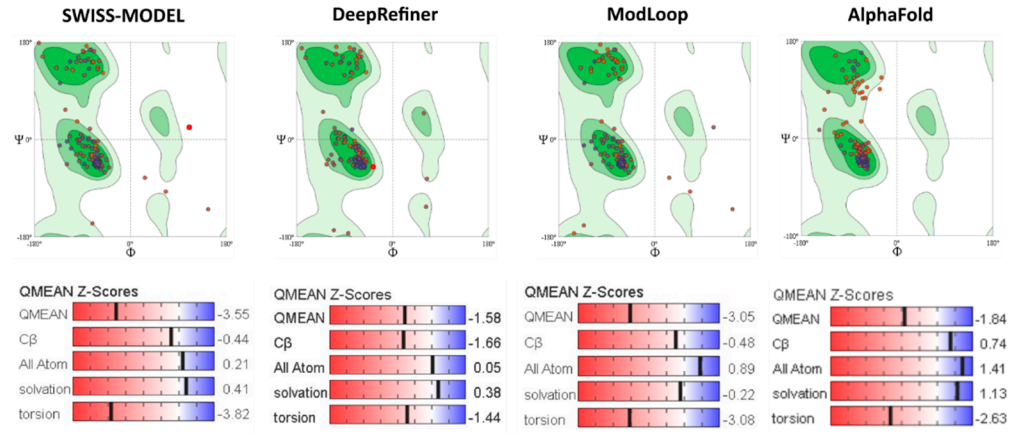

Supplement: s1 [file s1]
